# Supplementary material for: Where salience goes beyond authenticity
Source: Atypon-hosted journal article supplement (doi:10.1024/1010-0652/a000357), 2023-06-12
Supplement: 1010-0652_a000357_esm1.pdf [file 1010-0652_a000357_esm1.pdf]

Electronic supplementary material 1

**Table E1.** Summary of the Studies in the Analysis

| No | Author, Year                 | Domain  | Type of control | Prior Knowledge | Authenticity (functional) | Physical resemblance | Salience | Outcome               |
|----|------------------------------|---------|-----------------|-----------------|---------------------------|----------------------|----------|-----------------------|
| 1  | Aksoy, 2019                  | medical | baseline        | low             | high                      | high                 | enhanced | technical performance |
| 2  | Al Najjar, 2020              | nursing | instructed      | low             | high                      | high                 | low      | general               |
| 3  | Alhaj et al., 2020           | nursing | instructed      | high            | high                      | high                 | low      | general               |
| 4  | Alhazmi et al. 2018          | medical | instructed      | low             | high                      | low                  | low      | diagnose              |
| 5  | Amerjee et al., 2018         | medical | baseline        | low             | high                      | high                 | low      | communication         |
| 6  | Argalious et al. 2019        | medical | instructed      | high            | high                      | high                 | low      | management            |
| 7  | Azizi et al., 2020           | medical | baseline        | high            | high                      | high                 | high     | diagnose              |
| 8  | Balachander et al., 2021     | medical | baseline        | high            | low                       | low                  | high     | technical performance |
| 9  | Baumann et al. 2019          | medical | baseline        | high            | high                      | high                 | low      | technical performance |
| 10 | Berger-Estilita et al., 2020 | medical | instructed      | low             | high                      | high                 | high     | diagnose              |
| 11 | Bergeron et al., 2019        | medical | instructed      | low             | multiple                  | low                  | low      | multiple              |
| 12 | Bintley et al., 2019         | medical | baseline        | high            | high                      | high                 | low      | diagnose              |
| 13 | Cannone et al., 2019         | medical | baseline        | high            | high                      | high                 | high     | communication         |
| 14 | Canóvas et al, 2020          | medical | baseline        | high            | high                      | high                 | high     | multiple              |
| 15 | Chen et al, 2019             | medical | instructed      | low             | high                      | high                 | low      | general               |
| 16 | Cheung et al., 2018          | medical | instructed      | low             | high                      | high                 | high     | multiple              |
| 17 | Chon et al., 2018            | medical | baseline        | high            | high                      | high                 | high     | multiple              |
| 18 | Clark et al. 2020            | medical | baseline        | multiple        | high                      | high                 | low      | technical performance |
| 19 | Colman et al., 2019          | medical | baseline        | low             | high                      | high                 | high     | multiple              |
| 20 | Costa et al (2020)           | nursing | instructed      | low             | high                      | low                  | enhanced | multiple              |
| 21 | Du et al, 2020               | medical | instructed      | low             | low                       | low                  | high     | general               |
| 22 | Foglia et al., (2020)        | medical | waiting         | low             | low                       | NA                   | high     | multiple              |
| 23 | Fortune et al., (2019)       | medical | baseline        | mixed           | high                      | high                 | high     | multiple              |
| 24 | Fouilloux et al., 2019       | medical | baseline        | high            | high                      | high                 | high     | technical performance |
| 25 | Frank et al., 2020           | medical | baseline        | high            | multiple                  | multiple             | multiple | diagnose              |

| No | Author, Year              | Domain  | Type of control | Prior Knowledge | Authenticity (functional) | Physical resemblance | Salience | Outcome               |
|----|---------------------------|---------|-----------------|-----------------|---------------------------|----------------------|----------|-----------------------|
| 26 | Gaylle, 2019              | nursing | baseline        | high            | high                      | NA                   | low      | multiple              |
| 27 | Geoffroy et al., 2020     | medical | instructed      | low             | high                      | high                 | low      | communication         |
| 28 | Gillan et al. 2018        | medical | baseline        | multiple        | multiple                  | multiple             | multiple | multiple              |
| 29 | Han et al., 2018          | nursing | baseline        | high            | high                      | high                 | high     | management            |
| 30 | Hassan et al., 2018       | medical | instructed      | high            | high                      | high                 | low      | multiple              |
| 31 | Havaladar et al., 2020    | medical | baseline        | high            | high                      | high                 | low      | multiple              |
| 32 | Hayashi et al., 2020      | medical | baseline        | mixed           | high                      | high                 | enhanced | multiple              |
| 33 | Hooper et al., 2019       | medical | waiting         | low             | NA                        | NA                   | low      | technical performance |
| 34 | Jaberi & Momennasab, 2019 | medical | waiting         | low             | high                      | high                 | low      | multiple              |
| 35 | Kahrman et al., 2018      | nursing | instructed      | high            | high                      | high                 | enhanced | multiple              |
| 36 | Kang et al., 2020         | nursing | baseline        | high            | high                      | high                 | high     | multiple              |
| 37 | Kardada et al., 2019      | nursing | instructed      | low             | NA                        | NA                   | NA       | multiple              |
| 38 | Kirkpatrick2020           | nursing | instructed      | low             | high                      | low                  | high     | management            |
| 39 | Lai et al., 2020          | medical | baseline        | low             | high                      | NA                   | high     | communication         |
| 40 | Lehmann et al., 2019      | medical | instructed      | high            | low                       | low                  | high     | management            |
| 41 | Li et al., 2020           | medical | instructed      | low             | high                      | high                 | low      | multiple              |
| 42 | Luckie et al., 2019       | teacher | instructed      | mixed           | low                       | low                  | low      | management            |
| 43 | Marko et al., 2019        | medical | baseline        | mixed           | high                      | high                 | NA       | multiple              |
| 44 | Mastroleo et al., 2020    | other   | instructed      | low             | high                      | high                 | enhanced | multiple              |
| 45 | McConnaughey et al., 2018 | medical | instructed      | low             | high                      | high                 | high     | management            |
| 46 | Mouli et al., 2020        | medical | baseline        | low             | high                      | high                 | enhanced | technical performance |
| 47 | Mutlu et al., 2019        | medical | baseline        | low             | high                      | high                 | low      | general               |
| 48 | Odongkara et al., 2020    | medical | baseline        | high            | low                       | low                  | high     | management            |
| 49 | Okamoto et al., 2020      | nursing | baseline        | high            | high                      | low                  | low      | multiple              |
| 50 | Paige et al., 2019        | medical | baseline        | mixed           | high                      | NA                   | high     | teamwork              |
| 51 | Park et al., 2018         | medical | instructed      | low             | high                      | high                 | low      | multiple              |
| 52 | Plackett et al., 2020     | medical | instructed      | low             | high                      | high                 | low      | diagnose              |
| 53 | Ramey et al., 2018        | medical | baseline        | low             | high                      | high                 | high     | management            |

| No                                                                                             | Author, Year               | Domain  | Type of control | Prior Knowledge | Authenticity (functional) | Physical resemblance | Salience | Outcome               |
|------------------------------------------------------------------------------------------------|----------------------------|---------|-----------------|-----------------|---------------------------|----------------------|----------|-----------------------|
| 54                                                                                             | Rao et al., 2018           | medical | instructed      | low             | high                      | high                 | low      | teamwork              |
| 55                                                                                             | Rehman et al, 2020         | medical | baseline        | high            | high                      | high                 | high     | diagnose              |
| 56                                                                                             | Sacouto et al., 2018       | medical | baseline        | low             | high                      | low                  | high     | technical performance |
| 57                                                                                             | Servotte et al., 2019      | medical | instructed      | mixed           | high                      | NA                   | enhanced | multiple              |
| 58                                                                                             | Sharour, 2019              | medical | instructed      | low             | high                      | high                 | high     | diagnose              |
| 59                                                                                             | Smink et al., 2018         | medical | instructed      | low             | high                      | NA                   | low      | multiple              |
| 60                                                                                             | Sultan et al., 2019        | medical | instructed      | low             | low                       | low                  | low      | multiple              |
| 61                                                                                             | Sussel et al., 2019        | medical | instructed      | low             | high                      | high                 | high     | technical performance |
| 62                                                                                             | Tamaki et al., 2019        | nursing | instructed      | high            | low                       | high                 | low      | multiple              |
| 63                                                                                             | Tawalbeh, 2020             | nursing | instructed      | high            | high                      | high                 | high     | general               |
| 64                                                                                             | Torkshavand et al., 2019   | medical | instructed      | high            | high                      | high                 | high     | multiple              |
| 65                                                                                             | Urwin et al., 2020         | medical | waiting         | low             | high                      | high                 | high     | technical performance |
| 66                                                                                             | Uslu-Sahan&Terzioglu, 2020 | medical | baseline        | mixed           | high                      | high                 | high     | diagnose              |
| 67                                                                                             | Walsh et al., 2020         | medical | baseline        | low             | high                      | low                  | high     | multiple              |
| 68                                                                                             | Wang et al. 2020           | medical | baseline        | mixed           | high                      | low                  | high     | management            |
| 69                                                                                             | Wenzel et al. 2020         | medical | multiple        | low             | high                      | high                 | multiple | multiple              |
| 70                                                                                             | Wong et al., 2019          | medical | baseline        | high            | high                      | high                 | high     | technical performance |
| 71                                                                                             | Xiangdong & Li, 2019       | other   | instructed      | low             | high                      | high                 | high     | technical performance |
| 72                                                                                             | Yang et al, 2018           | medical | baseline        | high            | high                      | high                 | low      | diagnose              |
| 73                                                                                             | Yeo et al., 2020           | medical | waiting         | high            | high                      | NA                   | low      | technical performance |
| 74                                                                                             | Yilmazer et al., 2019      | nursing | baseline        | low             | high                      | high                 | enhanced | multiple              |
| <b>Studies retrieved from the meta-analysis by Chernikova, Heitzmann, Stadler et al., 2020</b> |                            |         |                 |                 |                           |                      |          |                       |
| 1                                                                                              | Abrahamson et al., 2004    | medical | instructed      | high            | high                      | high                 | high     | technical performance |
| 2                                                                                              | Adcock et al., 2010        | other   | baseline        | low             | high                      | high                 | low      | communication         |
| 3                                                                                              | Ahad et al., 2013          | medical | baseline        | high            | high                      | high                 | low      | technical performance |
| 4                                                                                              | Ahad et al., 2013          | medical | baseline        | high            | low                       | low                  | low      | technical performance |
| 5                                                                                              | Ahlberg et al, 2007        | medical | waiting         | high            | low                       | high                 | high     | technical performance |
| 6                                                                                              | Ahqvist et al., 2013       | medical | baseline        | low             | high                      | low                  | low      | diagnose              |

| No | Author, Year              | Domain  | Type of control | Prior Knowledge | Authenticity (functional) | Physical resemblance | Salience | Outcome               |
|----|---------------------------|---------|-----------------|-----------------|---------------------------|----------------------|----------|-----------------------|
| 7  | Ahmad et al., 2015        | medical | baseline        | high            | high                      | high                 | NA       | technical performance |
| 8  | Ahn et al., 2015          | medical | instructed      | low             | high                      | high                 | low      | management skills     |
| 9  | Ainsworth et al., 2012 I  | medical | instructed      | low             | low                       | low                  | high     | general               |
| 10 | Ainsworth et al., 2012 II | medical | instructed      | low             | low                       | low                  | high     | general               |
| 11 | Alfred et al., 2012       | other   | instructed      | low             | high                      | low                  | enhanced | general               |
| 12 | Alinier et al., 2006      | medical | instructed      | low             | high                      | high                 | NA       | general               |
| 13 | Alyousef et al., 2017     | medical | baseline        | high            | high                      | high                 | high     | management skills     |
| 14 | Andreatta et al., 2011    | medical | instructed      | low             | high                      | high                 | high     | technical performance |
| 15 | Andreatta et al., 2015a   | medical | baseline        | mix             | high                      | high                 | high     | multiple              |
| 16 | Andreatta et al., 2015b   | medical | baseline        | mix             | high                      | high                 | high     | multiple              |
| 17 | Aper et al., 2012         | medical | baseline        | high            | high                      | multiple             | multiple | communication         |
| 18 | Araujo et al., 2014       | medical | waiting         | low             | high                      | NA                   | NA       | technical performance |
| 19 | Atayee et al., 2016       | medical | baseline        | low             | high                      | high                 | enhanced | general               |
| 20 | Auten et al., 2015        | medical | baseline        | high            | high                      | low                  | low      | diagnose              |
| 21 | Bachmann et al., 2013     | medical | waiting         | low             | high                      | high                 | low      | communication         |
| 22 | Banks et al., 2007        | medical | instructed      | high            | middle                    | low                  | high     | technical performance |
| 23 | Bender et al., 2014       | medical | instructed      | low             | high                      | high                 | low      | multiple              |
| 24 | Bentley et al., 2015      | medical | baseline        | high            | multiple                  | high                 | low      | technical performance |
| 25 | Berney et al., 2017       | medical | baseline        | high            | high                      | high                 | low      | communication         |
| 26 | Biese et al., 2009        | medical | baseline        | mix             | high                      | low                  | low      | technical performance |
| 27 | Bjerrum et al., 2013      | medical | baseline        | low             | high                      | low                  | low      | technical performance |
| 28 | Blackwood et al., 2014    | medical | instructed      | high            | high                      | high                 | low      | management skills     |
| 29 | Bonczyk et al., 2016      | medical | mixed           | low             | middle                    | low                  | high     | technical performance |
| 30 | Bongers et al., 2015      | medical | baseline        | low             | high                      | high                 | high     | technical performance |
| 31 | Bonnetain et al., 2010    | medical | instructed      | high            | NA                        | high                 | enhanced | technical performance |
| 32 | Broadbent et al., 1971    | teacher | waiting         | high            | high                      | low                  | high     | diagnose              |
| 33 | Brown et al., 2010        | medical | baseline        | high            | high                      | high                 | high     | technical performance |
| 34 | Brubacher et al., 2015    | teacher | baseline        | high            | high                      | NA                   | low      | communication         |

| No | Author, Year                | Domain  | Type of control | Prior Knowledge | Authenticity (functional) | Physical resemblance | Saliency | Outcome               |
|----|-----------------------------|---------|-----------------|-----------------|---------------------------|----------------------|----------|-----------------------|
| 35 | Brunckhorst et al., 2014    | medical | instructed      | low             | high                      | high                 | NA       | general               |
| 36 | Brydges et al., 2012 I      | medical | baseline        | high            | high                      | high                 | high     | technical performance |
| 37 | Brydges et al., 2012 II     | medical | baseline        | high            | high                      | high                 | high     | technical performance |
| 38 | Burton et al., 2011         | medical | baseline        | high            | high                      | high                 | low      | multiple              |
| 39 | Cannon et al., 2014         | medical | instructed      | high            | high                      | high                 | NA       | multiple              |
| 40 | Carvalho et al., 2011       | medical | baseline        | high            | NA                        | NA                   | high     | communication         |
| 41 | Chao et al., 2015           | medical | instructed      | high            | high                      | high                 | high     | technical performance |
| 42 | Chen et al., 2017           | medical | instructed      | low             | NA                        | NA                   | NA       | general               |
| 43 | Cheng et al., 2018          | medical | baseline        | mix             | NA                        | high                 | NA       | general               |
| 44 | Chiu et al., 2012           | medical | instructed      | high            | high                      | high                 | high     | technical performance |
| 45 | Chung et al., 2011 I        | medical | baseline        | low             | high                      | high                 | enhanced | technical performance |
| 46 | Chung et al., 2011 II       | medical | baseline        | low             | high                      | high                 | enhanced | technical performance |
| 47 | Chung et al., 2018          | medical | baseline        | high            | high                      | low                  | low      | management skills     |
| 48 | Clayton et al., 2013        | medical | baseline        | high            | high                      | high                 | high     | communication         |
| 49 | Cuisinier et al., 2015      | medical | baseline        | high            | high                      | high                 | enhanced | multiple              |
| 50 | Damle et al., 2015          | medical | mixed           | high            | high                      | high                 | NA       | multiple              |
| 51 | Dankbaar et al., 2016       | medical | instructed      | high            | multiple                  | low                  | multiple | communication         |
| 52 | DeWaay et al., 2014         | medical | mixed           | low             | high                      | NA                   | NA       | multiple              |
| 53 | Ditton-Phare et al., 2016   | medical | baseline        | high            | high                      | NA                   | high     | communication         |
| 54 | Djukic et al., 2015 I       | medical | baseline        | low             | high                      | low                  | high     | multiple              |
| 55 | Djukic et al., 2015 II      | medical | baseline        | low             | high                      | low                  | high     | multiple              |
| 56 | Djukic et al., 2015 III     | medical | baseline        | low             | high                      | low                  | high     | multiple              |
| 57 | Djukic et al., 2015 IV      | medical | baseline        | low             | high                      | low                  | high     | multiple              |
| 58 | Douglas et al., 2016        | medical | waiting         | high            | high                      | low                  | low      | communication         |
| 59 | Dubovi et al., 2017         | medical | instructed      | low             | middle                    | low                  | enhanced | technical performance |
| 60 | Dumont et al., 2016         | medical | baseline        | high            | high                      | NA                   | low      | diagnose              |
| 61 | Durmaz et al., 2012         | medical | baseline        | low             | high                      | low                  | enhanced | general               |
| 62 | Eghbalibabadi&Ashouri, 2014 | medical | baseline        | low             | high                      | high                 | NA       | technical performance |

| No | Author, Year            | Domain  | Type of control | Prior Knowledge | Authenticity (functional) | Physical resemblance | Salience | Outcome               |
|----|-------------------------|---------|-----------------|-----------------|---------------------------|----------------------|----------|-----------------------|
| 63 | Errek & Randolph, 1982  | other   | mixed           | mix             | NA                        | NA                   | NA       | communication         |
| 64 | Etezadi et al., 2016    | medical | baseline        | low             | NA                        | NA                   | NA       | general               |
| 65 | Evans et al., 2015      | medical | baseline        | low             | high                      | low                  | high     | management skills     |
| 66 | Fallucco et al., 2012   | medical | baseline        | high            | high                      | high                 | NA       | diagnose              |
| 67 | Fischer et al., 2011    | medical | baseline        | high            | high                      | NA                   | enhanced | multiple              |
| 68 | Fleming et al., 2009    | medical | waiting         | low             | high                      | low                  | low      | multiple              |
| 69 | Foster et al., 2015     | medical | instructed      | low             | high                      | low                  | low      | communication         |
| 70 | Fransen et al., 2012    | medical | waiting         | mix             | high                      | high                 | enhanced | general               |
| 71 | Gable et al., 2014      | medical | baseline        | high            | high                      | high                 | high     | multiple              |
| 72 | Girod&Girod, 2006       | teacher | instructed      | high            | high                      | low                  | low      | multiple              |
| 73 | Grover et al., 2015     | medical | baseline        | high            | high                      | NA                   | NA       | multiple              |
| 74 | Grunetti et al., 2014   | medical | baseline        | high            | high                      | high                 | enhanced | general               |
| 75 | Haak et al., 2008       | medical | instructed      | low             | high                      | low                  | NA       | communication         |
| 76 | Hamilton et al., 2001   | medical | instructed      | high            | high                      | low                  | NA       | technical performance |
| 77 | Harris et al., 2014     | medical | instructed      | low             | NA                        | NA                   | NA       | general               |
| 78 | Hebbar et al., 2015     | medical | instructed      | high            | high                      | low                  | NA       | technical performance |
| 79 | Hecimovich et al., 2014 | medical | baseline        | high            | high                      | high                 | low      | general               |
| 80 | Helder et al., 2016 I   | medical | baseline        | low             | low                       | low                  | enhanced | technical performance |
| 81 | Henney & Boysen, 1979   | teacher | instructed      | low             | high                      | low                  | low      | diagnose              |
| 82 | Heskin et al., 2015     | medical | baseline        | low             | high                      | high                 | NA       | general               |
| 83 | Hobgood et al., 2005    | medical | baseline        | high            | high                      | high                 | high     | communication         |
| 84 | Johnson et al, 2014     | medical | baseline        | low             | high                      | low                  | high     | diagnose              |
| 85 | Johnson et al., 2012    | medical | mixed           | low             | high                      | high                 | enhanced | general               |
| 86 | Jones et al., 2014      | medical | baseline        | high            | high                      | high                 | low      | general               |
| 87 | Kash et al., 2009       | medical | baseline        | high            | high                      | low                  | high     | multiple              |
| 88 | Keleekai et al., 2016   | medical | waiting         | high            | high                      | high                 | high     | technical performance |
| 89 | Khatib et al., 2014     | medical | instructed      | low             | high                      | low                  | high     | multiple              |
| 90 | Kiersma et al., 2009    | medical | baseline        | low             | low                       | low                  | low      | management skills     |

| No  | Author, Year             | Domain  | Type of control | Prior Knowledge | Authenticity (functional) | Physical resemblance | Salience | Outcome               |
|-----|--------------------------|---------|-----------------|-----------------|---------------------------|----------------------|----------|-----------------------|
| 91  | Koparan & Yilmaz, 2015   | teacher | instructed      | low             | high                      | low                  | NA       | general               |
| 92  | Kwon et al., 2015        | medical | waiting         | low             | high                      | low                  | high     | technical performance |
| 93  | Kumar & Sherwood, 2007   | teacher | baseline        | low             | high                      | low                  | enhanced | general               |
| 94  | Lavelle et al., 2017     | medical | baseline        | high            | high                      | high                 | NA       | general               |
| 95  | Lee Chin et al., 2014    | medical | instructed      | low             | low                       | high                 | low      | multiple              |
| 96  | Lehmann et al., 2015     | medical | instructed      | low             | high                      | high                 | enhanced | technical performance |
| 97  | Liao et al., 2013 I      | medical | instructed      | high            | high                      | high                 | enhanced | technical performance |
| 98  | Liao et al., 2013 II     | medical | instructed      | high            | high                      | high                 | enhanced | technical performance |
| 99  | Liaw et al., 2011        | medical | waiting         | low             | high                      | high                 | high     | diagnose              |
| 100 | Liaw et al., 2014 I      | medical | baseline        | low             | high                      | low                  | enhanced | diagnose              |
| 101 | Liaw et al., 2014 II     | medical | baseline        | low             | high                      | high                 | low      | diagnose              |
| 102 | Liaw et al., 2015        | medical | waiting         | low             | high                      | low                  | high     | diagnose              |
| 103 | Madan et al., 1998       | medical | instructed      | high            | high                      | high                 | NA       | multiple              |
| 104 | Maertens et al., 2017    | medical | instructed      | mix             | NA                        | NA                   | NA       | technical performance |
| 105 | Martin et al., 2015      | medical | instructed      | high            | high                      | low                  | enhanced | general               |
| 106 | Matsuda et al., 2013     | teacher | baseline        | low             | high                      | multiple             | multiple | general               |
| 107 | McIntosh et al., 2014    | medical | waiting         | high            | high                      | NA                   | NA       | general               |
| 108 | Nelissen et al., 2015 I  | medical | baseline        | high            | low                       | NA                   | NA       | multiple              |
| 109 | Nelissen et al., 2015 II | other   | baseline        | high            | low                       | NA                   | NA       | multiple              |
| 110 | Newell & Newell, 2018    | other   | baseline        | low             | high                      | NA                   | NA       | general               |
| 111 | Ogan et al., 2004        | medical | waiting         | low             | NA                        | NA                   | NA       | technical performance |
| 112 | Ortner et al., 2014      | medical | baseline        | mix             | high                      | high                 | low      | technical performance |
| 113 | O'Sullivan et al., 2014  | medical | waiting         | low             | NA                        | NA                   | NA       | technical performance |
| 114 | Overbaugh et al., 1995   | teacher | baseline        | low             | high                      | low                  | high     | management skills     |
| 115 | Pantziaras et al., 2015  | other   | baseline        | high            | high                      | high                 | low      | general               |
| 116 | Passman et al., 2006     | medical | baseline        | mix             | high                      | NA                   | NA       | technical performance |
| 117 | Popadiuk et al., 2002    | medical | instructed      | low             | NA                        | NA                   | NA       | technical performance |
| 118 | Pucher et al., 2014      | medical | instructed      | high            | high                      | NA                   | NA       | general               |

| No  | Author, Year              | Domain  | Type of control | Prior Knowledge | Authenticity (functional) | Physical resemblance | Salience | Outcome               |
|-----|---------------------------|---------|-----------------|-----------------|---------------------------|----------------------|----------|-----------------------|
| 119 | Rajan et al., 2015        | medical | baseline        | low             | high                      | low                  | low      | general               |
| 120 | Overbaugh et al., 1995    | teacher | baseline        | low             | high                      | low                  | high     | management skills     |
| 121 | Randell et al., 2007 I    | other   | instructed      | low             | high                      | low                  | high     | technical performance |
| 122 | Randell et al., 2007 II   | other   | instructed      | low             | high                      | low                  | high     | technical performance |
| 123 | Reis et al., 2013         | medical | instructed      | mix             | high                      | NA                   | NA       | multiple              |
| 124 | Ross et al., 2001         | other   | baseline        | mix             | NA                        | NA                   | high     | multiple              |
| 125 | Saraf et al., 2014        | medical | baseline        | low             | high                      | low                  | NA       | multiple              |
| 126 | Sauter et al., 2016       | medical | baseline        | mix             | high                      | NA                   | high     | general               |
| 127 | Scott et al., 2013        | medical | baseline        | high            | high                      | high                 | low      | technical performance |
| 128 | Sheakley et al., 2016     | medical | instructed      | low             | high                      | high                 | low      | general               |
| 129 | Sibbald et al., 2013      | medical | instructed      | high            | low                       | NA                   | NA       | diagnose              |
| 130 | Skinner et al., 2016      | medical | baseline        | low             | NA                        | NA                   | NA       | diagnose              |
| 131 | Solomon et al., 2004      | medical | waiting         | mix             | NA                        | NA                   | NA       | general               |
| 132 | Sorensen et al., 2015     | medical | baseline        | high            | high                      | multiple             | high     | technical performance |
| 133 | Sperl-Hillen et al., 2014 | medical | instructed      | mix             | NA                        | NA                   | NA       | management skills     |
| 134 | Roter et al., 2012        | medical | mixed           | high            | NA                        | NA                   | NA       | communication         |
| 135 | Stegmann et al., 2012     | medical | instructed      | low             | high                      | high                 | low      | diagnose              |
| 136 | Ten Eyck et al., 2010     | medical | instructed      | high            | high                      | high                 | high     | multiple              |
| 137 | Tobin et al., 2013        | medical | baseline        | low             | high                      | low                  | enhanced | general               |
| 138 | Wenk et al., 2009         | medical | instructed      | low             | high                      | NA                   | NA       | multiple              |
| 139 | Wheatley et al., 1988     | other   | instructed      | mix             | NA                        | NA                   | NA       | general               |
| 140 | Yeh & Chen, 2005          | medical | baseline        | mix             | NA                        | NA                   | NA       | general               |



## Reference List: Studies in the Analysis

- Abrahamson, S., & Denson, J. (1968). A developmental study of medical training simulators for anesthesiologists. Final Report. (Report No. BR-5-0917). Los Angeles: University of Southern California.  
[https://archive.org/stream/ERIC\\_ED019253/ERIC\\_ED019253\\_djvu.txt](https://archive.org/stream/ERIC_ED019253/ERIC_ED019253_djvu.txt)
- Adcock, A. B., Duggan, M. H., Watson, G. S., & Belfore, L. A. (2010). The impact of content area focus on the effectiveness of a web-based simulation. *British Journal of Educational Technology*, 41(3), 388–402. <https://doi.org/10.1111/j.1467-8535.2009.00947.x>
- Ahad, S., Boehler, M., Schwind, C. & Hassan, I. (2013). The effect of model fidelity on colonoscopic skills acquisition. A randomized controlled study. *Journal of Surgical Education*, 70(4), 522–527. <http://dx.doi.org/10.1016/j.jsurg.2013.02.010>
- Ahlberg, G., Enochsson, L., Gallagher, A. G., Hedman, L., Hogman, C., McClusky III, D. A., Ramel, S., Smith, D., Arvidsson, D. (2007). Proficiency-based virtual reality training significantly reduces the error rate for residents during their first 10 laparoscopic cholecystectomies. *The American Journal of Surgery*, 193(6), 797–804.  
<https://doi.org/10.1016/j.amjsurg.2006.06.050>
- Ahlqvist, J., Nilsson, T., Hedman, L., Desser, T., Dev, P., Johansson, M., Youngblood, P., Cheng, R., & Gold, G. (2013). A randomized controlled trial on 2 simulation-based training methods in radiology effects on radiologic technology student skill in assessing image quality. *Simulation in Healthcare: Journal of the Society for Simulation in Healthcare*, 8(6), 382–387. <http://dx.doi.org/10.1097/SIH.0b013e3182a60a48>
- Ahmad, R., Alhashmi, G., Ajlan, A., & Eldeek, B. (2015). Impact of high-fidelity transvaginal ultrasound simulation for radiology on residents' performance and satisfaction. *Academic Radiology*, 22(2), 234–239. <https://doi.org/10.1016/j.acra.2014.09.006>
- Ahn, H., & Kim, H-Y. (2015). Implementation and outcome evaluation of high-fidelity simulation scenarios to integrate cognitive and psychomotor skills for Korean nursing students. *Nurse Education Today*, 35(5), 706–711.  
<http://dx.doi.org/10.1016/j.nedt.2015.01.021>
- Ainsworth, H., Gilchrist, M., Grant, C., Hewitt, C., Ford, S., Petrie, M., Torgerson, C., & Torgerson, D. (2011). Computer-based instruction for improving student nurses' general numeracy: Is it effective? Two randomised trials. *Educational Studies*, 38(2), 1–13.  
<https://doi.org/10.1080/03055698.2011.598668>
- Aksoy, E. (2019). Comparing the Effects on Learning Outcomes of Tablet-Based and Virtual Reality–Based Serious Gaming Modules for Basic Life Support Training: Randomized Trial. *JMIR Serious Games*, 7 (2), e13442. <https://doi.org/10.2196/13442>
- Al Najjar, H. (2020). Effectiveness of team-based learning with high fidelity simulation in an undergraduate pediatric course for nurses. *Saudi Journal for Health Sciences*, 9 (1), 12–16. [https://doi.org/10.4103/sjhs.sjhs\\_198\\_19](https://doi.org/10.4103/sjhs.sjhs_198_19)
- Alfred, M., & Chung, C. (2011). Design, development, and evaluation of a second generation interactive Simulator for Engineering Ethics Education (SEEE2). *Science and Engineering Ethics*, 18(4), 689–697. <http://dx.doi.org/10.1007/s11948-011-9284-0>
- Alhaj Ali, A., Miller, E., Ballman, K., Bakas, T., Geis, G., & Ying, J. (2020). The impact of debriefing modalities on nurse practitioner students' knowledge and leadership skills in

- managing fatal dysrhythmias: A pilot study. *Nurse Education in Practice*, 42, 102687. <https://doi.org/10.1016/j.nepr.2019.102687>
- Alhazmi, M. S., Butler, C. W., & Junghans, B. M. (2018). Does the virtual refractor patient-simulator improve student competency when refracting in the consulting room? *Clinical and Experimental Optometry*, 101(6), 771–777. <https://doi.org/10.1111/cxo.12800>
- Alinier, G., Hunt, B., Gordon, R., & Harwood, C. (2006). Effectiveness of intermediate-fidelity simulation training technology in undergraduate nursing education. *Journal of Advanced Nursing*, 54(3), 359–369. <https://doi.org/10.1111/j.1365-2648.2006.03810.x>
- Alyousef, S., Marwa, H., Alnojaidi, N., Lababidi, H., & Bashir, S. (2017). Cumulative evaluation data: Pediatric airway management simulation courses for pediatric residents. *Advances in Simulation*, 2(11). <https://doi.org/10.1186/s41077-017-0044-3>
- Amerjee, A., Akhtar, M., Ahmed, I., & Irfan, S. (2018). Hybrid simulation training: An effective teaching and learning modality for intrauterine contraceptive device insertion. *Education for Health*, 31 (2), 119. [https://doi.org/10.4103/efh.EfH\\_357\\_17](https://doi.org/10.4103/efh.EfH_357_17)
- Andreatta, P., Chen, Y., Marsh, M., & Cho, K. (2010). Simulation-based training improves applied clinical placement of ultrasound-guided PICCs. *Supportive Care in Cancer: Official Journal of the Multinational Association of Supportive Care in Cancer*, 19(4), 539–543. <http://dx.doi.org/10.1007/s00520-010-0849-2>
- Andreatta, P., Hash, S., Klotz, J., Hauptman, J., Biddinger, B., & House, J. (2015). Performance-based comparison of neonatal intubation training outcomes simulator and live animal. *Advances in Neonatal Care : Official Journal of the National Association of Neonatal Nurses*, 15(1), 56–64. <http://dx.doi.org/10.1097/ANC.000000000000001>
- Andreatta, P., Hash, S., Klotz, J., Hauptman, J., Biddinger, B., & House, J. (2016). Retention curves for pediatric and neonatal intubation skills after simulation-based training. *Pediatric Emergency Care*, 32(2), 71–76. <http://dx.doi.org/10.1097/PEC.0000000000000603>
- Andreatta, P., Klotz, J., Madsen, J., Hurst, C., Talbot, T. (2015). Outcomes from two forms of training for first-responder competency in cholinergic crisis management. *Military Medicine*, 180(4), 468–474. <http://dx.doi.org/10.7205/MILMED-D-14-00290>
- Aper, L., Reniers, J., Koole, S., Valcke, M., & Derese, A. (2012). Impact of three alternative consultation training formats on self-efficacy and consultation skills of medical students. *Medical Teacher*, 34(7), 500–507. <https://doi.org/10.3109/0142159X.2012.668627>
- Araújo, S., Delaney, C., Seid, V., Imperiale, A., Bertoncini, A., Nahas, S., & Cecconello, I. (2014). Short-duration virtual reality simulation training positively impacts performance during laparoscopic colectomy in animal model: Results of a single-blinded randomized trial – VR warm-up for laparoscopic colectomy. *Surgical Endoscopy*, 28(9), 2547–2554. <https://doi.org/10.1007/s00464-014-3500-3>
- Argalious, M., Trombetta, C., Makarova, N., Saasouh, W., & Rajan, S. (2019). Simulation Versus Problem Based Learning for Cerebrospinal Drainage Catheter Insertion and Management: A Randomized Trial in a Large Academic Anesthesiology Residency Program. *Journal of Cardiothoracic and Vascular Anesthesia*, 33 (4), 993–1000. <https://doi.org/10.1053/j.jvca.2018.07.033>
- Atayee, R., Awdishu, L., & Namba, J. (2016). Using simulation to improve first-year pharmacy students' ability to identify medication errors involving the top 100

- prescription medications. *American Journal of Pharmaceutical Education*, 80(5), 86–96. <https://dx.doi.org/10.5688%2Fajpe80586>
- Auten, J., Ross, E., French, M., Li, I., Robinson, L., Brown, N., King, K., & Tanen, D. (2014). Low-fidelity hybrid sexual assault simulation training's effect on the comfort and competency of resident physicians. *The Journal of Emergency Medicine*, 48(3), 344–350. <https://doi.org/10.1016/j.jemermed.2014.09.032>
- Azizi, K., Ismail, M., Aftab, U., Afzal, B., & Mian, A. (2020). Effectiveness of High-Fidelity Simulation in Training Emergency Medicine Physicians in Point of Care Ultrasonography in Pakistan: A Quasi-Experimental Study. *Cureus* 12 (6), e8659. <https://doi.org/10.7759/cureus.8659>
- Bachmann, C., Barzel, A., Roschlaub, S., Ehrhardt, M., & Scherer, M. (2013). Can a brief two-hour interdisciplinary communication skills training be successful in undergraduate medical education? *Patient Education and Counseling*, 93(2), 298–305. <https://doi.org/10.1016/j.pec.2013.05.019>
- Balachander, B., Rajesh, D., Pinto, B. V., Stevens, S., & Rao PN, S. (2021). Simulation training to improve aseptic non-touch technique and success during intravenous cannulation—effect on hospital-acquired blood stream infection and knowledge retention after 6 months: The snowball effect theory. *The Journal of Vascular Access*, 22 (3), 353–358. <https://doi.org/10.1177/1129729820938202>
- Banks, E., Chudnoff, S., Karmin, I., Wang, C., & Pardanani, S. (2007). Does a surgical simulator improve resident operative performance of laparoscopic tubal ligation? *American Journal of Obstetrics and Gynecology*, 197(5), 541–545. <https://doi.org/10.1016/j.ajog.2007.07.028>
- Baumann, Q., Hardy, A., Courage, O., Lacombe, P., & Accadbled, F. (2019). Lessons taught by a knee arthroscopy simulator about participants in a European arthroscopy training programme. *Orthopaedics & Traumatology: Surgery & Research*, 105 (8), S287–S291. <https://doi.org/10.1016/j.otsr.2019.09.008>
- Bender, J., Kennally, K., Shields, R., & Overly, F. (2014). Does simulation booster impact retention of resuscitation procedural skills and teamwork? *Journal of Perinatology*, 34(9), 664–668. <https://doi.org/10.1038/jp.2014.72>
- Bentley, S., Mudan, G., Strother, C., & Wong, N. (2015). Are live ultrasound models replaceable? Traditional versus simulated education module for FAST exam. *Western Journal of Emergency Medicine*, 16(6), 818–822. <https://doi.org/10.5811/westjem.2015.9.27276>
- Berger-Estilita, J. M., Greif, R., Berendonk, C., Stricker, D., & Schnabel, K. P. (2020). Simulated patient-based teaching of medical students improves pre-anaesthetic assessment: A rater-blinded randomised controlled trial. *European Journal of Anaesthesiology*, 37 (5), 387–393. <https://doi.org/10.1097/EJA.0000000000001139>
- Bergeron, B., Hagen, M., Peterson, L., Dworkin, R., Bono, C., Graham, T., & Williams, M. (2019). Comparison of AR, ITS, CBT, and Didactic Training and Evaluation of Retinopathy-Based Diagnosis. *Military Medicine*, 184 (Supplement\_1), 579–583. <https://doi.org/10.1093/milmed/usy372>
- Biese, K., Moro-Sutherland, D., Furberg, R., Downing, B., Glickman, L., Murphy, A., Jackson, C., Snyder, G., & Hobgood, C. (2009). Using screen-based simulation to improve performance during pediatric resuscitation. *Academic Emergency Medicine* :

- Official Journal of the Society for Academic Emergency Medicine*, 16(2), 71–75.  
<http://dx.doi.org/10.1111/j.1553-2712.2009.00590.x>
- Bintley, H. L., Bell, A., & Ashworth, R. (2019). Remember to breathe: Teaching respiratory physiology in a clinical context using simulation. *Advances in Physiology Education*, 43(1), 76–81. <https://doi.org/10.1152/advan.00148.2018>
- Bjerrum, A., Hilberg, O., VanGog, T., Charles, P., & Eika, B. (2013). Effects of modelling examples in complex procedural skills training: A randomised study. *Medical Education*, 47(9), 888–898. <http://dx.doi.org/10.1111/medu.12199>
- Blackwood, J., Duff, J.P., Nettel-Aguirre, A., Djogovic, D., & Joynt, C. (2014). Does teaching crisis resource management skills improve resuscitation performance in pediatric residents? *Pediatric Critical Care Medicine*, 15(4), 168–174.  
<https://doi.org/10.1097/PCC.0000000000000100>
- Boncyk, C., Schroeder, K., Anderson, B., & Galgon, R. (2016). Two methods for teaching basic upper airway sonography. *Journal of Clinical Anesthesia*, 31(1), 166–172.  
<http://dx.doi.org/10.1016/j.jclinane.2016.01.040>
- Bongers, P., Hove, P., Stassen, L., Dankelman, J., & Schreuder, H.W. (2014). A new virtual reality training module for laparoscopic surgical skills and equipment handling: Can multitasking be trained? A randomized controlled trial. *Journal of Surgical Education*, 72(2), 184–191. <https://doi.org/10.1016/j.jsurg.2014.09.004>
- Bonnetain, E., Boucheix, J-M., Hamet, M., & Freysz, M. (2010). Benefits of computer screen-based simulation in learning cardiac arrest procedures. *Medical Education*, 44(7), 716–722. <https://doi.org/10.1111/j.1365-2923.2010.03708.x>
- Broadbent, F. W., Meehan, D. R. (1971). *An evaluation of simulation as an approach to assisting elementary teachers to identify children with learning disabilities and utilize ancillary personnel in initiating remediation programs within their classrooms. Final Report.* [S.l.]: Distributed by ERIC Clearinghouse.
- Brown, D., Miskovic, D., Tang, B., & Hanna, G. (2010). Impact of established skills in open surgery on the proficiency gain process for laparoscopic surgery. *Surgical Endoscopy*, 24(6), 1420–1426. <https://doi.org/10.1007/s00464-009-0792-9>
- Brubacher, S. P., Powell, M., Skouteris, H., & Guadagno, B. (2015). The effects of e-simulation interview training on teachers' use of open-ended questions. *Child Abuse & Neglect*, 43(1), 95–103. <https://doi.org/10.1016/j.chiabu.2015.02.004>
- Brunckhorst, O., Shahid, S., Aydın, A., Mcilhenny, C., Khan, S., Raza, S., Sahai, A., Brewin, J., Bello, F., Khan, M., Dasgupta, P., & Ahmed, K. (2015). Simulation-based ureteroscopy skills training curriculum with integration of technical and non-technical skills: A randomized controlled trial. *Surgical Endoscopy*, 29(9), 2728–2735.  
<http://dx.doi.org/10.1007/s00464-014-3996-6>
- Brydges, R., Nair, P., Ma, I., Shanks, D., & Hatala, R. (2012). Directed self-regulated learning versus instructor regulated learning in simulation training. *Medical Education*, 46(7), 648–656. <http://dx.doi.org/10.1111/j.1365-2923.2012.04268.x>
- Burton, K., Pendergrass, T., Byczkowski, T., Taylor, R., Moyer, M., Falcone, R., & Geis, G. (2011). Impact of simulation-based extracorporeal membrane oxygenation training in the simulation laboratory and clinical environment. *Simulation in Healthcare : Journal of the Society for Simulation in Healthcare*, 6(5), 284–291.  
<http://dx.doi.org/10.1097/SIH.0b013e31821dfcea>

- Cannon, W., Garrett, W., Hunter, R., Sweeney, H., Eckhoff, D., Nicandri, G., Hutchinson, M., Johnson, D., Bisson, L., Bedi, A., Hill, J., Koh, J., & Reinig, K. (2014). Improving residency training in arthroscopic knee surgery with use of a virtual-reality simulator: A randomized blinded study. *The Journal of Bone and Joint Surgery*, *96*(21), 1798–1806. <http://dx.doi.org/10.2106/JBJS.N.00058>
- Cannone, D., Atlas, M., Fornari, A., Barilla-LaBarca, M.-L., & Hoffman, M. (2019). Delivering Challenging News: An Illness-Trajectory Communication Curriculum for Multispecialty Oncology Residents and Fellows. *MedEdPORTAL*, *15*, e10819. [https://doi.org/10.15766/mep\\_2374-8265.10819](https://doi.org/10.15766/mep_2374-8265.10819)
- Cánovas Zaldúa, Y., Casabella Abril, B., Martín Cantera, C., González García, F., Moreno Escribá, S., & del Val García, J. L. (2020). Evaluación de un modelo formativo para profesionales sanitarios en la atención del paciente crítico: Estudio AIPCAP. *Atención Primaria*, *52* (3), 151–158. <https://doi.org/10.1016/j.aprim.2018.08.009>
- Carvalho, I., Pais, V., Almeida, S., Ribeiro-Silva, R., Figueiredo-Braga, M., Teles, A., Castro-Vale, I., & Mota-Cardoso, R. (2011). Learning clinical communication skills: Outcomes of a program for professional practitioners. *Patient Education and Counseling*, *84*(1), 84–89. <http://dx.doi.org/10.1016/j.pec.2010.05.010>
- Chao, C., Chalouhi, G., Bouhanna, P., Ville, Y., & Dommergues, M. (2015). Randomized clinical trial of virtual reality simulation training for transvaginal gynecologic ultrasound skills. *Journal of Ultrasound in Medicine : Official Journal of the American Institute of Ultrasound in Medicine*, *34*(9), 1663–1667. <https://doi.org/10.7863/ultra.15.14.09063>
- Chen, R., Grierson, L., & Norman, G. (2015). Evaluating the impact of high- and low-fidelity instruction in the development of auscultation skills. *Medical Education*, *49*(3), 276–285. <http://dx.doi.org/10.1111/medu.12653>
- Chen, Y., Zheng, K., Ye, S., Wang, J., Xu, L., Li, Z., Meng, Q., Yang, J., & Feng, S.-T. (2019). Constructing an experiential education model in undergraduate radiology education by the utilization of the picture archiving and communication system (PACS). *BMC Medical Education*, *19* (1), 383. <https://doi.org/10.1186/s12909-019-1827-0>
- Cheng, H., Podolsky, D. J., Fisher, D. M., Wong, K. W., Lorenz, H. P., Khosla, R. K., Drake, J. M., & Forrest, C. R. (2018). Teaching palatoplasty using a high-fidelity cleft palate simulator. *Plastic and Reconstructive Surgery*, *141*(1), 91–98. <https://doi.org/10.1097/PRS.00000000000003957>
- Cheung, J. J. H., Kulasegaram, K. M., Woods, N. N., Moulton, C.-a., Ringsted, C. V., & Brydges, R. (2018). Knowing How and Knowing Why: Testing the effect of instruction designed for cognitive integration on procedural skills transfer. *Advances in Health Sciences Education*, *23* (1), 61–74. <https://doi.org/10.1007/s10459-017-9774-1>
- Chiu, M., Arab, A., Elliott, R., & Naik, V. (2011). An experiential teaching session on the anesthesia machine check improves resident performance. *Canadian Journal of Anaesthesia (Journal canadien d'anesthésie)*, *59*(3), 280–287. <https://doi.org/10.1007/s12630-011-9649-5>
- Chon, S.-H., Hilgers, S., Timmermann, F., Dratsch, T., Plum, P. S., Berth, F., Datta, R., Alakus, H., Schlößer, H. A., Schramm, C., Pinto dos Santos, D., Bruns, C., & Kleinert, R. (2018). Web-Based Immersive Patient Simulator as a Curricular Tool for Objective

- Structured Clinical Examination Preparation in Surgery: Development and Evaluation. *JMIR Serious Games*, 6 (3), e10693. <https://doi.org/10.2196/10693>
- Chung, C., Cooper, S., Cant, R., Connell, C., Mckay, A., Kinsman, L., Gazula, S., Boyle, J., Cameron, A., Cash, P., Evans, L., Kim, J., Masud, R., McInnes, D., Norman, L., Penz, E., Rotter, T., Tanti, E., & Breakspear, T. (2018). The educational impact of web-based and face-to-face patient deterioration simulation programs: An interventional trial. *Nurse Education Today*, 64(1), 93–98. <http://dx.doi.org/10.1016/j.nedt.2018.01.037>
- Chung, G. K. W. K., Gyllenhammer, R. G., & Baker E. L. (2011). *The effects of practicing with a virtual ultrasound trainer on FAST window identification, acquisition, and diagnosis*. CRESST Report 787. National Center for Research on Evaluation, Standards, and Student Testing (CRESST). [https://www.semanticscholar.org/paper/The-Effects-of-Practicing-with-a-Virtual-Ultrasound-Chung-Gyllenhammer \(May, 2019\)](https://www.semanticscholar.org/paper/The-Effects-of-Practicing-with-a-Virtual-Ultrasound-Chung-Gyllenhammer/May,2019)
- Clark, A. E., Shaw, C. J., Bello, F., Chalouhi, G. E., & Lees, C. C. (2020). Quantitating skill acquisition with optical ultrasound simulation. *Australasian Journal of Ultrasound in Medicine*, 23 (3), 183–193. <https://doi.org/10.1002/ajum.12221>
- Clayton, J., Butow, P., Waters, A., Laidsaar-Powell, R., O'Brien, A., Boyle, F., Back, A., Arnold, R., Tulskey, J., & Tattersall, M. (2012). Evaluation of a novel individualised communication-skills training intervention to improve doctors' confidence and skills in end-of-life communication. *Palliative Medicine*, 27(3), 236–243. <https://doi.org/10.1177%2F0269216312449683>
- Colman, N., Figueroa, J., McCracken, C., & Hebbar, K. B. (2019). Can Simulation Based-Team Training Impact Bedside Teamwork in a Pediatric Intensive Care Unit? *Journal of Pediatric Intensive Care*, 08 (04), 195–203. <https://doi.org/10.1055/s-0039-1688928>
- Costa, R. R. d. O., Medeiros, S. M. d., Martins, J. C. A., Coutinho, V. R. D., & Araújo, M. S. d. (2020). Effectiveness of simulation in teaching immunization in nursing: A randomized clinical trial. *Revista Latino-Americana de Enfermagem*, 28, e3305. <https://doi.org/10.1590/1518-8345.3147.3305>
- Cuisinier, A., Schilte, C., Decléty, P., Picard, J., Berger, K., Bouzat, P., Falcon, D., Bosson, J-L., Payen, J-F., & Albaladejo, P. (2015). A major trauma course based on posters, audio-guides and simulation improves the management skills of medical students: Evaluation via medical simulator. *Anaesthesia Critical Care & Pain Medicine*, 34(6), 339–344. <https://doi.org/10.1016/j.accpm.2015.06.009>
- Damle, L. F., Tefera, E., McAfee, J., Loyd, M. K., Jackson, A. M., Auguste, T. C., & Gomez-Lobo, V. (2015). Pediatric and Adolescent Gynecology Education through Simulation (PAGES): Development and evaluation of a simulation curriculum. *Journal of Pediatric and Adolescent Gynecology*, 28(3), 186–191. <https://doi.org/10.1016/j.jpag.2014.07.008>
- Dankbaar, M., Alsma, J., Jansen, E. E., Merrienboer, J. J., Saase, J. L., & Schuit, S. (2016). An experimental study on the effects of a simulation game on students' clinical cognitive skills and motivation. *Advances in Health Sciences Education*, 21(3), 505–521. <https://doi.org/10.1007/s10459-015-9641-x>
- DeWaay, D. J., McEvoy, M. D., Alexander, L. A., Kern, D. H., & Nietert, P. J. (2014). Simulation curriculum can improve medical student assessment and management of acute coronary syndrome during a clinical practice exam. *The American Journal of the Medical Sciences*, 347(6), 452–456. <https://doi.org/10.1097/MAJ.0b013e3182a562d7>

- Ditton-Phare, P., Sandhu, H., Kelly, B., Kissane, D., & Loughland, C. (2016). Pilot evaluation of a communication skills training program for psychiatry residents using standardized patient assessment. *Academic Psychiatry, 40*(5), 768–775.  
<https://doi.org/10.1007/s40596-016-0560-9>
- Djukic, M., Adams, J., Fulmer, T., Szyld, D., Lee, S., Oh, S-Y., & Triola, M. (2015). E-learning with virtual teammates: A novel approach to interprofessional education. *Journal of Interprofessional Care, 29*(5), 476–482.  
<https://doi.org/10.3109/13561820.2015.1030068>
- Douglas, S., Andrade, A., Boyd, S., Leslie, M., Webb, L., Davis, L., Fraine, M., Frazer, N., Hargraves, R., & Bickman, L. (2016). Communication training improves patient-centered provider behavior and screening for soldiers' mental health concerns. *Patient Education and Counseling, 99*(7), 1203–1212.  
<https://doi.org/10.1016/j.pec.2016.01.018>
- Draiko, C. V., Yamarat, K., Panza, A., Draleru, J., Taban, M., Onyango, J., Akur, R., & Omega, R. A. (2018). Training interventions on Helping Babies Breathe among health workers in tertiary hospital of the Republic of South Sudan: A non-randomized quasi-experimental study. *Healthcare in Low-resource Settings, 6* (1).  
<https://doi.org/10.4081/hls.2018.7276>
- Du, Y.-C., Fan, S.-C., & Yang, L.-C. (2020). The impact of multi-person virtual reality competitive learning on anatomy education: A randomized controlled study. *BMC Medical Education, 20* (1), 343. <https://doi.org/10.1186/s12909-020-02155-9>
- Dubovi, I., Levy, S., & Dagan, E. (2017). Now I know how! The learning process of medication administration among nursing students with non-immersive desktop virtual reality simulation. *Computers & Education, 113*(1), 16–27.  
<https://doi.org/10.1016/j.compedu.2017.05.009>
- Dumont, T. , Hakim, J., Black, A., & Fleming, N. (2016). Does an advanced pelvic simulation curriculum improve resident performance on a pediatric and adolescent gynecology focused objective structured clinical Examination? A cohort study. *Journal of Pediatric and Adolescent Gynecology, 29*(3), 276–279. <https://doi.org/10.1016/j.jpog.2015.10.015>
- Durmaz, A., Sarıkaya, A., Cakan, E., & Cakir, S. (2012). Effect of screen-based computer simulation on knowledge and skill in nursing students' learning of preoperative and postoperative care management a randomized controlled study. *Computers, Informatics, Nursing: CIN, 30*(4), 196–203. <https://doi.org/10.1097/NCN.0b013e3182419134>
- Eghbalibabadi, M., & Ashouri, E. (2014). Comparison of the effects of two teaching methods on the nursing students' performance in measurement of blood pressure. *Iranian Journal of Nursing and Midwifery Research, 19*(4), 381–384.  
<https://www.ncbi.nlm.nih.gov/pmc/articles/PMC4145493/>
- Errek, H., & Randolph, D. (1982). Effects of discussion and role-play activities in the acquisition of consultant interview skills. *Journal of Counseling Psychology, 29*(3), 304–308. <http://dx.doi.org/10.1037/0022-0167.29.3.304>
- Etezadi, F., Najafi, A., Pourfakhr, P., Moharari, R., Khajavi, M., Imani, F., & Barzin, G. (2016). An assessment of intubation skill training in novice anesthesiology residents of Tehran University of Medical Sciences with the use of mannequins. *Anesthesiology and Pain Medicine, 6*(6), Article e39184. <https://dx.doi.org/10.5812/a000357>

- Evans, K., Daines, W., Tsui, J., Strehlow, M., Maggio, P., & Shieh, L. (2014). Septris: A novel, mobile, online, simulation game that improves sepsis recognition and management. *Academic Medicine : Journal of the Association of American Medical Colleges*, *90*(2), 180–184. <https://doi.org/10.1097/ACM.0000000000000611>
- Fallucco, E. M., Conlon, M. K., Gale, G. W., Constantino, J. N., & Glowinski, A. (2012). Use of a standardized patient paradigm to enhance proficiency in risk assessment for adolescent depression and suicide. *The Journal of Adolescent Health : Official Publication of the Society for Adolescent Medicine*, *51*(1), 66–72 . <https://doi.org/10.1016/j.jadohealth.2011.12.026>
- Fisher, N., Eisen, L. A., Bayya, J. V., Dulu, A., Bernstein, P. S., Merkatz, I. R., & Goffman, D. (2011). Improved performance of maternal-fetal medicine staff after maternal cardiac arrest simulation-based training. *American Journal of Obstetrics and Gynecology*, *205*(3), 239.e1–239.e5. <https://doi.org/10.1016/j.ajog.2011.06.012>
- Fleming, M., Olsen, D., Stathes, H., Boteler, L., Grossberg, P., Pfeifer, J., Schiro, S., Banning, J., & Skochelak, S. (2009). Virtual reality skills training for health care professionals in alcohol screening and brief intervention. *Journal of the American Board of Family Medicine*, *22*(4), 387–398. <https://doi.org/10.3122/jabfm.2009.04.080208>
- Foglia, L. M., Eubanks, A. A., Peterson, L. C., Hickey, K., Hammons, C. B., Borgia, L. B., Light, M. R., Jackson, A., & Deering, S. (2020). Creation and Evaluation of a Cesarean Section Simulator Training Program for Novice Obstetric Surgeons. *Cureus*, *12* (9), e10324. <https://doi.org/10.7759/cureus.10324>
- Fortune, J., Breckon, J., Norris, M., Eva, G., & Frater, T. (2019). Motivational interviewing training for physiotherapy and occupational therapy students: Effect on confidence, knowledge and skills. *Patient Education and Counseling*, *102* (4), 694–700. <https://doi.org/10.1016/j.pec.2018.11.014>
- Foster, A., Chaudhary, N., Murphy, J., Lok, B., Waller, J., & Buckley, P. (2014). The use of simulation to teach suicide risk assessment to health profession trainees – Rationale, methodology, and a proof of concept demonstration with a virtual patient. *Academic Psychiatry*, *39*(6), 620–629. <https://doi.org/10.1007/s40596-014-0185-9>
- Fouilloux, V., Gran, C., Guervilly, C., Breaud, J., El Louali, F., & Rostini, P. (2019). Impact of education and training course for ECMO patients based on high-fidelity simulation: A pilot study dedicated to ICU nurses. *Perfusion*, *34* (1), 29–34. <https://doi.org/10.1177/0267659118789824>
- Frank, E. M., Doherty-Restrepo, J., Roberts, L., & Montalvo, A. (2020). Simulation-Based Instruction in Continuing Education. *Athletic Training Education Journal*, *15* (1), 65–74. <https://doi.org/10.4085/150117069>
- Gable, B., Gardner, A., Celik, D., Bhalla, M., & Ahmed, R. (2014). Improving bariatric patient transport and care with simulation. *The Western Journal of Emergency Medicine*, *15*(2), 199–204. <https://dx.doi.org/10.5811/westjem.2013.12.18855>
- Gaylle, D. (2019). In-simulation Debriefing Increases Therapeutic Communication Skills. *Nurse Educator*, *44* (6), 295–299. <https://doi.org/10.1097/NNE.0000000000000643>
- Geoffroy, P. A., Delyon, J., Strullu, M., Dinh, A. T., Duboc, H., Zafrani, L., Etienne, I., Lejoyeux, M., Ceccaldi, P.-F., Plaisance, P., & Peyre, H. (2020). Standardized Patients or Conventional Lecture for Teaching Communication Skills to Undergraduate Medical



- Students: A Randomized Controlled Study. *Psychiatry Investigation*, 17 (4), 299–305.  
<https://doi.org/10.30773/pi.2019.0258>
- Gillan, C., Papadakos, J., Bruhal, J., Harnett, N., Hogan, A., Milne, E., & Giuliani, M. E. (2018). Impact of High-Fidelity E-Learning on Knowledge Acquisition and Satisfaction in Radiation Oncology Trainees. *Current Oncology*, 25 (6), 533–538.  
<https://doi.org/10.3747/co.25.4090>
- Girod, M., & Girod, G. (2006). Exploring the efficacy of the cook school district simulation. *Journal of Teacher Education*, 57(5), 481–497.  
<https://doi.org/10.1177%2F0022487106293742>
- Grover, S., Garg, A., Scaffidi, M., Yu, J., Plener, I., Yong, E., Cino, M., Grantcharov, T., & Walsh, C. (2015). Impact of a simulation training curriculum on technical and nontechnical skills in colonoscopy: A randomized trial. *Gastrointestinal Endoscopy*, 82(6), 1072–1079. <https://doi.org/10.1016/j.gie.2015.04.008>
- Grugnetti, A., Bagnasco, A., & Sasso, L. (2013). Effectiveness of a clinical skills workshop for drug-dosage calculation in a nursing program. *Nurse Education Today*, 34(4), 619–624. <https://doi.org/10.1016/j.nedt.2013.05.021>
- Haak, R., Rosenbohm, J., Koerfer, A., Obliers, R., & Wicht, M. (2008). The effect of undergraduate education in communication skills: A randomised controlled clinical trial. *European Journal of Dental Education: Official Journal of the Association for Dental Education in Europe*, 12(4), 213–218. <https://doi.org/10.1111/j.1600-0579.2008.00521.x>
- Hamilton, E., Scott, D., Kapoor, A., Nwariaku, F., Bergen, P., Rege, R., Tesfay, S., & Jones, D. B. (2002). Improving operative performance using a laparoscopic hernia simulator. *American Journal of Surgery*, 182(6), 725–728. [http://dx.doi.org/10.1016/S0002-9610\(01\)00800-5](http://dx.doi.org/10.1016/S0002-9610(01)00800-5)
- Han, M.-J., Lee, J.-R., Shin, Y.-J., Son, J.-S., Choi, E.-J., Oh, Y.-H., Lee, S.-H., & Choi, H.-R. (2018). Effects of a simulated emergency airway management education program on the self-efficacy and clinical performance of intensive care unit nurses: Effects of simulation education. *Japan Journal of Nursing Science*, 15 (3), 258–266.  
<https://doi.org/10.1111/jjns.12195>
- Harris, M., Pittiglio, L., Newton, S., & Moore, G. (2014). Using simulation to improve the medication administration skills of undergraduate nursing students. *Nursing Education Perspectives*, 35(1), 26–29. <http://dx.doi.org/10.5480/11-552.1>
- Hassan, A. B., Rcp, P., Elamin, A., & Jaradat, A. A. K. (2018). Impact of Clinical Simulation on the Clinical Competence of Medical Students Clerkship Training. *Bahrain Medical Bulletin*, 40 (4), 230-233.
- Havaladar, A. A., Krishna, B., Sampath, S., & Paramasivam, S. K. (2020). Simulation Training in Hemodynamic Monitoring and Mechanical Ventilation: An Assessment of Physician's Performance. *Indian Journal of Critical Care Medicine*, 24 (6), 423–428.  
<https://doi.org/10.5005/jp-journals-10071-23458>
- Hayashi, F., Marino Rodrigues Ayres, P. P., Miethke Morais, A., Laércio de Araújo Sousa, M., Valente Barbas, C. S., Leite Vieira Costa, E., Caruso, P., & Carvalho Ferreira, J. (2020). Impact of a respiratory ICU rotation on resident knowledge and confidence in managing mechanical ventilation. *Jornal Brasileiro de Pneumologia*, 46 (5), e20190108–e20190108. <https://doi.org/10.36416/1806-3756/e20190108>

- Hebbar, K., Cunningham, C., McCracken, C., Kamat, P., & Fortenberry, J. (2014). Simulation-based paediatric intensive care unit central venous line maintenance bundle training. *Intensive & Critical Care Nursing : The Official Journal of the British Association of Critical Care Nurses*, 31(1), 44–50.  
<https://doi.org/10.1016/j.iccn.2014.10.003>
- Hecimovich, M., & Volet, S. (2014). Simulated learning in musculoskeletal assessment and rehabilitation education: Comparing the effect of a simulation-based learning activity with a peer-based learning activity. *BMC Medical Education*, 14(1), 253.  
<https://doi.org/10.1186/s12909-014-0253-6>
- Helder, M. K., Rowse, P., Ruparel, R., Li, Z., Farley, D., Joyce, L., & Stulak, J. (2015). Basic cardiac surgery skills on sale for \$22.50: An aortic anastomosis simulation curriculum. *The Annals of Thoracic Surgery*, 101(1), 316–322.  
<http://dx.doi.org/10.1016/j.athoracsur.2015.08.005>
- Henney, M., & Boysen, V. (1979). The effect of computer simulation training on ability to administer an informal reading inventory. *The Journal of Educational Research*, 72(5), 265–270. <https://doi.org/10.1080/00220671.1979.10885168>
- Heskin, L., Mansour, E., Lane, B., Kavanagh, D., Dicker, P., Ryan, D., Gildea-Byrne, K., Pawlikowska, T., Tierney, S., & Traynor, O. (2015). The impact of a surgical boot camp on early acquisition of technical and nontechnical skills by novice surgical trainees. *The American Journal of Surgery*, 210(3), 570–577.  
<https://doi.org/10.1016/j.amjsurg.2014.12.046>
- Hobgood, C., Harward, D., Newton, K., & Davis, W. (2005). The educational intervention "GRIEV\_ING" improves the death notification skills of residents. *Academic Emergency Medicine : Official Journal of the Society for Academic Emergency Medicine*, 12(4), 296–301. <http://dx.doi.org/10.1197/j.aem.2004.12.008>
- Hooper, J., Tsiridis, E., Feng, J. E., Schwarzkopf, R., Waren, D., Long, W. J., Poultsides, W., Macaulay, W., Papagiannakis, G., Kenanidis, E., Rodriguez, E. D., Slover, J., Egol, K. A., Phillips, D. P., Friedlander, S., Collins, M. (2019). Virtual Reality Simulation Facilitates Resident Training in Total Hip Arthroplasty: A Randomized Controlled Trial. *The Journal of Arthroplasty* 34(10), 2278-2283,  
<https://doi.org/10.1016/j.arth.2019.04.002>.
- Jaberi, A., & Momennasab, M. (2019). Effectiveness of Standardized Patient in Abdominal Physical Examination Education: A Randomized, Controlled Trial. *Clinical Medicine & Research*, 17 (1-2), 1–10. <https://doi.org/10.3121/cmr.2019.1446>
- Johnson, D., Corrigan, T., Gulickson, G., Holshouser, E., & Johnson, S. (2012). The effects of a human patient simulator vs. a CD-ROM on performance. *Military Medicine*, 177(10), 1131–1135. <http://dx.doi.org/10.7205/MILMED-D-12-00179>
- Johnson, T., Lyons, R., Kopper, R., Johnsen, K., Lok, B., & Cendan, J. (2014). Virtual patient simulations and optimal social learning context: A replication of an aptitude-treatment interaction effect. *Medical Teacher*, 36(6), 486–494.  
<https://doi.org/10.3109/0142159X.2014.890702>
- Jones, J., Staub, J., Seymore, A., & Scott, L.A. (2014). Securing the second front: Achieving first receiver safety and security through competency-based tools. *Prehospital and Disaster Medicine*, 29(6), 643–647. <https://doi.org/10.1017/s1049023x14001058>

- Kahrیمان, I., Öztürk, H., Bahcecik, N., Sökmen, S., Küçük, S., Calbayram, N., & Altundag, S. (2018). The effect of theoretical and simulation training on medical errors of nurse students in Karadeniz Technical University, Turkey. *Journal of the Pakistan Medical Association*, 68 (11), 1636-1643.
- Kang, K.-A., Kim, S.-J., Lee, M.-N., Kim, M., & Kim, S. (2020). Comparison of Learning Effects of Virtual Reality Simulation on Nursing Students Caring for Children with Asthma. *International Journal of Environmental Research and Public Health*, 17 (22), 8417. <https://doi.org/10.3390/ijerph17228417>
- Karkada, S., Radhakrishnan, J., Natarajan, J., Matua, G. A., & Kaddoura, M. (2019). Knowledge and Competency of Novice Nursing Students in Nasogastric Tube Feeding: Is Simulation Better than Case Scenario? *Oman Medical Journal*, 34 (6), 528–533. <https://doi.org/10.5001/omj.2019.96>
- Kash, K., Leas, B., Clough, J., Dodick, D., Capobianco, D., Nash, D., & Bance, L. (2009). ACGME competencies in neurology Web-based objective simulated computerized clinical encounters. *Neurology*, 72(10), 893–898. <http://dx.doi.org/10.1212/01.wnl.0000344164.98457.bf>
- Keleekai-Brapoh, N., Schuster, C., Murray, C., King, M., Stahl, B., Labrozzi, L., Gallucci, S., Leclair, M., Glover, K. (2016). Improving nurses' peripheral intravenous catheter insertion knowledge, confidence, and skills using a simulation-based blended learning program: A randomized trial. *Simulation in Healthcare: The Journal of the Society for Simulation in Healthcare*, 11(6), 376–384. <https://dx.doi.org/10.1097%2FSIH.0000000000000186>
- Khatib, M., Hald, N., Brenton, H., Barakat, M., F., Sarker, S., Standfield, N., Ziprin, P., & Bello, F. (2014). Validation of open inguinal hernia repair simulation model – A randomised controlled educational trial. *The American Journal of Surgery*, 208(2), 295–301. <https://doi.org/10.1016/j.amjsurg.2013.12.007>
- Kiersma, M.E., Darbishire, P.L., Plake, K.S., Oswald, C.A., & Walters, B.M. (2009). Laboratory session to improve first-year pharmacy students' knowledge and confidence concerning the prevention of medication errors. *American Journal of Pharmaceutical Education*, 73(6), 99. <https://doi.org/10.5688/aj730699>
- Kirkpatrick, A. J., Cantrell, M. A., & Smeltzer, S. C. (2020). Palliative care knowledge and self-awareness in active and observing undergraduate nursing students after end-of-life simulation. *International Journal of Palliative Nursing*, 26 (3), 133–142. <https://doi.org/10.12968/ijpn.2020.26.3.133>
- Koparan, T., & Yılmaz, G. (2015). The effect of simulation-based learning on prospective teachers' inference skills in teaching probability. *Universal Journal of Educational Research*, 3(11), 775–786. [http://www.hrpub.org/journals/article\\_info.php?aid=3011](http://www.hrpub.org/journals/article_info.php?aid=3011)
- Kumar, D. D., & Sherwood, R. D. (2007). Effect of a problem-based simulation on the conceptual understanding of undergraduate science education students. *Journal of Science Education and Technology*, 16(3), 239–246. <https://doi.org/10.1007/s10956-007-9049-3>
- Kwon, S., Hong, S. H., Kim, E., Park, H., You, Y., Kim, & Y.-H. (2015). The efficacy of lumbosacral spine phantom to improve resident proficiency in performing ultrasound-guided spinal procedure. *Pain Medicine*, 16(12), 2284–2291. <https://doi.org/10.1111/pme.12870>

- Lai, M. M. Y., Roberts, N., Mohebbi, M., & Martin, J. (2020). A randomised controlled trial of feedback to improve patient satisfaction and consultation skills in medical students. *BMC Medical Education*, 20 (1), 277. <https://doi.org/10.1186/s12909-020-02171-9>
- Lavelle, M., Attoe, C., Tritschler, C., & Cross, S. (2017). Managing medical emergencies in mental health settings using an interprofessional in situ simulation training programme: A mixed methods evaluation study. *Nurse Education Today*, 59(1), 103–109. <https://doi.org/10.1016/j.nedt.2017.09.009>
- Lee Chin, K., Yap, C., Lee, W. L., & Soh, Y. (2014). Comparing effectiveness of high-fidelity human patient simulation vs case-based learning in pharmacy education. *American Journal of Pharmaceutical Education*, 78(8), 153. <https://doi.org/10.5688/ajpe788153>
- Lehmann, R., Bosse, H. M., Simon, A., Nikendei, C., & Huwendiek, S. (2013). An innovative blended learning approach using virtual patients as preparation for skills laboratory training: Perceptions of students and tutors. *BMC Medical Education*, 13(1), 23. <https://doi.org/10.1186/1472-6920-13-23>
- Lehmann, R., Lutz, T., Helling-Bakki, A., Kummer, S., Huwendiek, S., & Bosse, H. M. (2019). Animation and interactivity facilitate acquisition of pediatric life support skills: A randomized controlled trial using virtual patients versus video instruction. *BMC Medical Education*, 19 (1), 7. <https://doi.org/10.1186/s12909-018-1442-5>
- Li, S., Li, G., Liu, Y., Xu, W., Yang, N., Chen, H., Li, N., Luo, K., & Jin, S. (2020). Development and Assessment of a Gastroscopy Electronic Learning System for Primary Learners: Randomized Controlled Trial. *Journal of Medical Internet Research*, 22 (3), e16233. <https://doi.org/10.2196/16233>
- Liao, W.-C., Leung, J., Wang, H.-P., Chang, W.-H., Chu, C.-H., Lin, J.-T., Wilson, R., Lim, B., & Leung, F. (2013). Coached practice using ERCP mechanical simulator improves trainees' ERCP performance: A randomized controlled trial. *Endoscopy*, 45(10), 799–805. <http://dx.doi.org/10.1055/s-0033-1344224>
- Liaw, S., Chan, S., Chen, F. G., Hooi, S., & Siau, C. (2014). Comparison of virtual patient simulation with mannequin-based simulation for improving clinical performances in assessing and managing clinical deterioration: Randomized controlled trial. *Journal of Medical Internet Research*, 16(9), Article e214. <http://dx.doi.org/10.2196/jmir.3322>
- Liaw, S., Lai F. W., Chan, S., Ho, J., Mordiffi, S., Ang, S., Goh, P.-S., & Ang, E. (2015). Designing and evaluating an Interactive multimedia Web-based simulation for developing nurses' competencies in acute nursing care: Randomized controlled trial. *Journal of Medical Internet Research*, 17(1), Article e5. <https://doi.org/10.2196/jmir.3853>
- Liaw, S., Rethans, J.-J., Scherpbier, A., & Klainin-Yobas, P. (2011). Rescuing a Patient in Deteriorating Situations (RAPIDS): A simulation-based educational program on recognizing, responding and reporting of physiological signs of deterioration. *Resuscitation*, 82(9), 1224-1230. <https://doi.org/10.1016/j.resuscitation.2011.04.014>
- Luckie, K., Saini, B., Soo, Y. Y., Kritikos, V., Collins, J. C., & Moles, R. J. (2019). Impact of scenario based training on asthma first aid knowledge and skills in school staff: An open label, three-arm, parallel-group repeated measures study. *Journal of Asthma*, 56 (9), 973–984. <https://doi.org/10.1080/02770903.2018.1508471>

- Madan, A. K., Caruso, B., Lopes, J. E., & Gracely, E. J. (1998). Comparison of simulated patient and didactic methods of teaching HIV risk assessment to medical residents. *American Journal of Preventive Medicine*, 15(2), 114–119. [https://doi.org/10.1016/s0749-3797\(98\)00026-9](https://doi.org/10.1016/s0749-3797(98)00026-9)
- Maertens, H., Aggarwal, R., Moreels, N., Vermassen, F., & Van Herzeele, I. (2017). A Proficiency Based Stepwise Endovascular Curricular Training (PROSPECT) program enhances operative performance in real life: A randomised controlled trial. *European Journal of Vascular and Endovascular Surgery*, 54(3), 387–396. <https://doi.org/10.1016/j.ejvs.2017.06.011>
- Marko, E. K., Fausett, M. B., Deering, S., Staat, B. C., Stormes, S., Freund, E., & Maxwell, G. L. (2019). Reducing Perineal Lacerations Through Team-Based Simulation. *Simulation in Healthcare: The Journal of the Society for Simulation in Healthcare*, 14(3), 182–187. <https://doi.org/10.1097/SIH.0000000000000378>
- Martin, K., Patterson, D., Phisitkul, P., Cameron, K., Femino, J., & Amendola, A. (2015). Ankle arthroscopy simulation improves basic skills, anatomic recognition, and proficiency during diagnostic examination of residents in training. *Foot & Ankle International*, 36(7), 827–835. <https://doi.org/10.1177%2F1071100715576369>
- Mastroleo, N. R., Humm, L., Williams, C. M., Kiluk, B. D., Hoadley, A., & Magill, M. (2020). Initial testing of a computer-based simulation training module to support clinicians' acquisition of CBT skills for substance use disorder treatment. *Journal of Substance Abuse Treatment*, 114, 108014. <https://doi.org/10.1016/j.jsat.2020.108014>
- Matsuda, N., Yarzebinski, E., Keiser, V., Raizada, R., Stylianides, G., & Koedinger, K. (2013). Studying the effect of a competitive game show in a learning by teaching environment. *International Journal of Artificial Intelligence in Education*, 23(1–4), 1–21. <https://doi.org/10.1007/s40593-013-0009-1>
- McConnaughey, S., Freeman, R., Kim, S., & Sheehan, F. (2018). Integrating Scaffolding and Deliberate Practice Into Focused Cardiac Ultrasound Training: A Simulator Curriculum. *MedEdPORTAL*, 14, 10671. [https://doi.org/10.15766/mep\\_2374-8265.10671](https://doi.org/10.15766/mep_2374-8265.10671)
- McIntosh, K., Gregor, J., Khanna, N. (2014). Computer-based virtual reality colonoscopy simulation improves patient-based colonoscopy performance. *Canadian Journal of Gastroenterology & Hepatology*, 28(4), 203–206. <https://www.ncbi.nlm.nih.gov/pmc/articles/PMC4071915/>
- Mouli, T., Davuluri, A., Vijaya, S., Priyanka, A. Y., & Mishra, S. (2020). Effectiveness of simulation based teaching of ventilatory management among non-anaesthesiology residents to manage COVID 19 pandemic - A Quasi experimental cross sectional pilot study. *Indian Journal of Anaesthesia*, 64 (14), 136. [https://doi.org/10.4103/ija.IJA\\_452\\_20](https://doi.org/10.4103/ija.IJA_452_20)
- Mutlu, B., Yılmaz, O. E., & Dur, S. (2019). The effect of high- and low-fidelity simulators in learning heart and lung sounds by undergraduate nurses: A randomized controlled trial. *Contemporary Nurse*, 55 (4-5), 351–359. <https://doi.org/10.1080/10376178.2019.1662321>
- Nelissen, E., Ersdal, H., Mduma, E., Evjen-Olsen, B., Broerse, J., Roosmalen, J., & Stekelenburg, J. (2015). Helping mothers survive bleeding after birth: Retention of knowledge, skills, and confidence nine months after obstetric simulation-based training.

- BMC Pregnancy and Childbirth*, 15(1), 190.  
<https://bmcpregnancychildbirth.biomedcentral.com/articles/10.1186/s12884-015-0612-2>
- Newell, M., & Newell, T.S. (2018). Analyzing the effect of consultation training on the development of consultation competence. *Contemporary School Psychology*, 22(1), 40–50. <http://dx.doi.org/10.1007/s40688-017-0151-0>
- O’Sullivan, O., Iohom, G., O’Donnell, B., & Shorten, G. (2014). The effect of simulation-based training on initial performance of ultrasound-guided axillary brachial plexus blockade in a clinical setting: A pilot study. *BMC Anesthesiology*, 14(1), 110. <https://doi.org/10.1186/1471-2253-14-110>
- Odongkara, B., Tylleskär, T., Pejovic, N., Achora, V., Mukunya, D., Ndeezi, G., Tumwine, J. K., & Nankabirwa, V. (2020). Adding video-debriefing to Helping-Babies-Breathe training enhanced retention of neonatal resuscitation knowledge and skills among health workers in Uganda: A cluster randomized trial. *Global Health Action*, 13 (1), 1743496. <https://doi.org/10.1080/16549716.2020.1743496>
- Ogan, K., Jacomides, L., Shulman, M., Roehrborn, C., Cadeddu, J., & Pearle, M. (2004). Virtual ureteroscopy predicts ureteroscopic proficiency of medical students on a cadaver. *The Journal of Urology*, 172(2), 667–671. <http://dx.doi.org/10.1097/01.ju.0000131631.60022.d9>
- Okamoto, R., Gouda, K., Koide, K., Tokimasa, M., Kageyama, M., Iwamoto, S., Shiomi, M., Kusano, E., Tanaka, M., Kiya, M., Tada, A., & Koetaka, H. (2020). Effectiveness of simulation learning program for mastering public health nursing skills to enhance strength of community: A quasi-experimental design. *Nurse Education Today*, 90, 104432. <https://doi.org/10.1016/j.nedt.2020.104432>
- Ortner, C., Richebé, P., Bollag, L., Ross, B. K., Landau, R. (2014). Repeated simulation-based training for performing general anesthesia for emergency cesarean delivery: Long-term retention and recurring mistakes. *International Journal of Obstetric Anesthesia*, 23(4), 341–347. <http://dx.doi.org/10.1016/j.ijoa.2014.04.008>
- Overbaugh, R. (1995). The efficacy of interactive video for teaching basic classroom management skills to pre-service teachers. *Computers in Human Behavior*, 11(3–4), 511–527. [https://doi.org/10.1016/0747-5632\(95\)80014-Y](https://doi.org/10.1016/0747-5632(95)80014-Y)
- Paige, J., Garbee, D., Yu, Q., Kiselov, V., Rusnak, V., & Detiege, P. (2019). Moving Along: Team Training for Emergency Room Trauma Transfers (T2ERT2). *Journal of Surgical Education*, 76 (5), 1402–1412. <https://doi.org/10.1016/j.jsurg.2019.03.013>
- Pantziaras, I., Fors, U., & Ekblad, S. (2015). Training with virtual patients in transcultural psychiatry: Do the learners actually learn? *Journal of Medical Internet Research*, 17(2), Article e46. <https://doi.org/10.2196/jmir.3497>
- Park, K.-M., Park, K.-Y., Kim, N.-E., Seo, B.-K., Park, H.-K., & Hwang, H.-S. (2018). Effects of Module Development and Role Play Course on Clinical Practice Examination Scores during a 4th Year Clerkship. *Korean Journal of Family Medicine*, 39 (1), 23. <https://doi.org/10.4082/kjfm.2018.39.1.23>
- Passman, M. A., Fleser, P. S., Dattilo, J. B., Guzman, R. J., & Naslund, T. C. (2007). Should simulator-based endovascular training be integrated into general surgery residency programs? *American Journal of Surgery*, 194(2), 212–219. <https://doi.org/10.1016/j.amjsurg.2006.11.029>

- Plackett, R., Kassianos, A. P., Kambouri, M., Kay, N., Mylan, S., Hopwood, J., Schartau, P., Gray, S., Timmis, J., Bennett, S., Valerio, C., Rodrigues, V., Player, E., Hamilton, W., Raine, R., Duffy, S., & Sheringham, J. (2020). Online patient simulation training to improve clinical reasoning: A feasibility randomized controlled trial. *BMC Medical Education*, 20 (1), 245. <https://doi.org/10.1186/s12909-020-02168-4>
- Popadiuk, C., Pottle, M., & Curran, V. (2002). Teaching digital rectal examinations to medical students: An evaluation study of teaching methods. *Academic Medicine : Journal of the Association of American Medical Colleges*, 77(11), 1140–1146. <https://doi.org/10.1097/00001888-200211000-00017>
- Pucher, P., Aggarwal, R., Qurashi, M., Singh, P., & Darzi, A. (2014). Randomized clinical trial of the impact of surgical ward-care checklists on postoperative care in a simulated environment. *British Journal of Surgery*. 101(13), 1666–1673. <https://doi.org/10.1002/bjs.9654>
- Rajan, S., Khanna, A., Argaliou, M., Kimatian, S., Mascha, E., Makarova, N., Nada, E., Elsharkawy, H., Firoozbakhsh, F., & Avitsian, R. (2016). Comparison of 2 resident learning tools—interactive screen-based simulated case scenarios versus problem-based learning discussions: A prospective quasi-crossover cohort study. *Journal of Clinical Anesthesia*. 28(1), 4 Please see my earlier comment at Fischer above...11. <https://doi.org/10.1016/j.jclinane.2015.08.003>
- Ramey, J., Mane Manohar, M. P., Shah, A., Keynan, A., Bayapalli, S., Ahmed, T., Arja, S. B., Bala A, S., & Acharya, Y. (2018). Implementation of standardized patient program using local resources in Avalon School of Medicine. *Journal of advances in medical education & professionalism*, 6(3), 137–141. <https://www.ncbi.nlm.nih.gov/pmc/articles/PMC6039824/>
- Randell, T., Hall, M., Bizo, L., & Remington, B. (2007). DTkid: Interactive simulation software for training tutors of children with autism. *Journal of Autism and Developmental Disorders*, 37(4). 637–647. <https://doi.org/10.1007/s10803-006-0193-z>
- Rao, P., Hill, E., Palka, C., Rea, K., Jones, K., Balzer, K., Cornell, T., Rooney, D., & Cousino, M. (2018). Improving Pediatric Resident Communication During Family-Centered Rounds Using a Novel Simulation-Based Curriculum. *MedEdPORTAL*, 14, 10733. [https://doi.org/10.15766/mep\\_2374-8265.10733](https://doi.org/10.15766/mep_2374-8265.10733)
- Rehman, Z. U., Moosa, M. A., & Riaz, Q. (2020). Knowledge gain of the non-vascular surgeons after attending a course on traumatic vascular emergencies. *The Journal of the Pakistan Medical Association*, 70 (2), 4.
- Reis, S., Sagi, D., Eisenberg, O., Kuchnir, Y., Azuri, J., Shalev, V., & Ziv, A. (2013). The impact of residents' training in electronic medical record (EMR) use on their competence: Report of a pragmatic trial. *Patient Education and Counseling*, 93(3), 515–521. <https://doi.org/10.1016/j.pec.2013.08.007>
- Ross, W., Pollman, W., Perry, D., Welty, J., & Jones, K. (2001). Interactive video negotiator training: A preliminary evaluation of the McGill negotiation simulator. *Simulation & Gaming*, 32(4), 451–468. <http://dx.doi.org/10.1177/104687810103200402>
- Roter, D. L., Cole, K. A., Kern, D. E., Barker, L. R., & Grayson, M. (1990). An evaluation of residency training in interviewing skills and the psychosocial domain of medical practice. *Journal of General Internal Medicine*, 5(4), 347–354. <https://doi.org/10.1007/BF02600404>

- Roter, D., Edelman, E., Larson, S., McNellis, R., Erby, L., Massa, M., Rackover, M., & McInerney, J. (2012). Effects of online genetics education on physician assistant interviewing skills. *JAAPA: Official Journal of the American Academy of Physician Assistants*, 25(8), 36–38. <http://dx.doi.org/10.1097/01720610-201208000-00007>
- Sá-Couto, C., Ferreira, A. M., Almeida, D., Nicolau, A., & Vieira-Marques, P. (2018). Evaluation of skills acquisition using a new low-cost tool for CPR self-training. *Porto Biomedical Journal*, 3 (1), e8. <https://doi.org/10.1016/j.pbj.0000000000000008>
- Saraf, S., Bayya, J., Weedon, J., Minkoff, H., & Fisher, N. (2014). The relationship of praise/criticism to learning during obstetrical simulation: A randomized clinical trial. *Journal of Perinatal Medicine*, 42(4), 1–8. <http://dx.doi.org/10.1515/jpm-2013-0247>
- Sauter, T., Hautz, W., Hostettler, S., Brodmann Maeder, M., Martinolli, L., Lehmann, B., Exadaktylos, A., & Haider, D. (2016). Interprofessional and interdisciplinary simulation-based training leads to safe sedation procedures in the emergency department. *Scandinavian Journal of Trauma, Resuscitation and Emergency Medicine*, 24(1), 97. <https://doi.org/10.1186/s13049-016-0291-7>
- Scott, L., Swartzentruber, D., Davis, C., Maddux, P., Schnellmann, J., & Wahlquist, A. (2013). Competency in chaos: Lifesaving performance of care providers utilizing a competency-based, multi-actor emergency preparedness training curriculum. *Prehospital and Disaster Medicine*, 28(4), 1–12. <http://dx.doi.org/10.1017/S1049023X13000368>
- Servotte, J.-C., Bragard, I., Szyld, D., Van Ngoc, P., Scholtes, B., Van Cauwenberge, I., Dardenne, N., Goosse, M., Pilote, B., Guillaume, M., & Ghuysen, A. (2019). Efficacy of a Short Role-Play Training on Breaking Bad News in the Emergency Department. *Western Journal of Emergency Medicine*, 20 (6), 893–902. <https://doi.org/10.5811/westjem.2019.8.43441>
- Sharour, L. A. (2019). Implementing simulation in oncology emergencies education: A quasi-experimental design. *Technology and Health Care*, 27 (2), 223–232. <https://doi.org/10.3233/THC-181543>
- Sheakley, M., Gilbert, G., Leighton, K., Hall, M., Callender, D., & Pederson, D. (2016). A brief simulation intervention increasing basic science and clinical knowledge. *Medical Education Online*, 21(1). <https://doi.org/10.3402/meo.v21.30744>
- Sibbald, M., McKinney, J., Cavalcanti, R.B., Yu, E.H., Wood, D.A., Nair, P.S., Eva, K.W., & Hatala, R. (2013). Cardiac examination and the effect of dual-processing instruction in a cardiopulmonary simulator. *Advances in Health Sciences Education : Theory and Practice*, 18(3), 497–508. <https://doi.org/10.1007/s10459-012-9388-6>
- Skinner, A., Freeman, R., & Sheehan, F. (2016). Quantitative feedback facilitates acquisition of skills in focused cardiac ultrasound. *Simulation in Healthcare : Journal of the Society for Simulation in Healthcare*, 11(2), 134–138. <http://dx.doi.org/10.1097/SIH.000000000000132>
- Smink, G. M., Jeffe, D. B., Hayashi, R. J., Al-Hammadi, N., & Fehr, J. J. (2019). Paediatric oncology simulation training for resident education. *BMJ Simulation and Technology Enhanced Learning*, 5 (3), 155–160. <https://doi.org/10.1136/bmjstel-2018-000347>
- Solomon, D., Laird-Fick, H., Keefe, C., Thompson, M., & Noel, M. (2004). Using a formative simulated patient exercise for curriculum evaluation. *BMC Medical Education*, 4(1), 8. <https://doi.org/10.1186/1472-6920-4-8>



- Sorensen, J., Van der Vleuten, C., Rosthøj, S., Østergaard, D., LeBlanc, V., Johansen, M., Ekelund, K., Starkopf, L., Lindschou, J., Gluud, C., Weikop, P., & Ottesen, B. (2015). Simulation-based multiprofessional obstetric anaesthesia training conducted *in situ* versus off-site leads to similar individual and team outcomes: A randomised educational trial. *British Medical Journal Open*, 5(10), e008344. <https://doi.org/10.1136/bmjopen-2015-008344corr1>
- Sperl-Hillen, J., O'Connor, P., Ekstrom, H., Rush, W., Asche, S., Fernandes, O., Apana, D., Amundson, G., Johnson, P., & Curran, D. (2014). Educating resident physicians using virtual case-based simulation improves diabetes management: A randomized controlled trial. *Academic Medicine : Journal of the Association of American Medical Colleges*, 89(12), 1664–1673. <http://dx.doi.org/10.1097/ACM.0000000000000406>
- Stegmann, K., Pilz, F., Siebeck, M., & Fischer, F. (2012). Vicarious learning during simulations: Is it more effective than hands-on training? *Medical Education*, 46(10), 1001–1008. <https://onlinelibrary.wiley.com/doi/abs/10.1111/j.1365-2923.2012.04344.x>
- Sultan, L., Abuznadah, W., Al-Jifree, H., Khan, M. A., Alsaywid, B., & Ashour, F. (2019). An Experimental Study On Usefulness Of Virtual Reality 360° In Undergraduate Medical Education. *Advances in Medical Education and Practice*, 10, 907–916. <https://doi.org/10.2147/AMEP.S219344>
- Suseel, A., Panchu, P., Varghese, S., George, T., & Joy, L. (2019). An Analysis of the Efficacy of Different Teaching Modalities in Imparting Adult Cardiopulmonary Resuscitation Skills among First-year Medical Students: A Pilot Study. *Indian Journal of Critical Care Medicine*, 23 (11), 509–512. <https://doi.org/10.5005/jp-journals-10071-23284>
- Tamaki, T., Inumaru, A., Yokoi, Y., Fujii, M., Tomita, M., Inoue, Y., Kido, M., Ohno, Y., & Tsujikawa, M. (2019). The effectiveness of end-of-life care simulation in undergraduate nursing education: A randomized controlled trial. *Nurse Education Today*, 76, 1–7. <https://doi.org/10.1016/j.nedt.2019.01.005>
- Tawalbeh, L. I. (2020). Effect of simulation modules on Jordanian nursing student knowledge and confidence in performing critical care skills: A randomized controlled trial. *International Journal of Africa Nursing Sciences*, 13, 100242. <https://doi.org/10.1016/j.ijans.2020.100242>
- Ten Eyck, R., Tews, M., Ballester, J., & Hamilton, G. (2010). Improved fourth-year medical student clinical decision-making performance as a resuscitation team leader after a simulation-based curriculum. *Simulation in Healthcare : Journal of the Society for Simulation in Healthcare*, 5(3), 139–145. <http://dx.doi.org/10.1097/SIH.0b013e3181cca544>
- Tobin, C., Clark, C., Mcevoy, M., Reves, J. G., Schaefer, J., Wolf, B., & Reeves, S. (2013). An approach to moderate sedation simulation training. *Simulation in Healthcare : Journal of the Society for Simulation in Healthcare*, 8(2), 114–123. <http://dx.doi.org/10.1097/SIH.0b013e3182786209>
- Torkshavand, G., Khatiban, M., & Soltanian, A. R. (2020). Simulation-based learning to enhance students' knowledge and skills in educating older patients. *Nurse Education in Practice*, 42, 102678. <https://doi.org/10.1016/j.nepr.2019.102678>
- Urwin, J. W., Trionfo, A., Storey, E. P., Brusalis, C. M., Gajewski, C., & Lawrence, J. T. R. (2020). A Novel Low-Cost Surgical Simulation Tool for Pinning Supracondylar

- Humerus Fractures. *Journal of Pediatric Orthopaedics*, 40 (5), e317–e321.  
<https://doi.org/10.1097/BPO.0000000000001460>
- Uslu-Sahan, F., & Terzioglu, F. (2020). Interprofessional simulation-based training in gynecologic oncology palliative care for students in the healthcare profession: A comparative randomized controlled trial. *Nurse Education Today*, 95, 104588.  
<https://doi.org/10.1016/j.nedt.2020.104588>
- Walsh, C. M., Scaffidi, M. A., Khan, R., Arora, A., Gimpaya, N., Lin, P., Satchwell, J., Al-Mazroui, A., Zarghom, O., Sharma, S., Kamani, A., Genis, S., Kalaichandran, R., & Grover, S. C. (2020). Non-technical skills curriculum incorporating simulation-based training improves performance in colonoscopy among novice endoscopists: Randomized controlled trial. *Digestive Endoscopy*, 32 (6), 940–948.  
<https://doi.org/10.1111/den.13623>
- Wang, Y., Hoogenes, J., Clark, R., Wong, N. C., Blankstein, U., Randhawa, H., Lovatt, C., Kim, K., Stern, N., Law, J., Sami, S., Uy, M., Moore, C., Shayegan, B., Kapoor, A., Lambe, S., Davies, T., Dave, S., Sener, A., & Matsumoto, E. D. (2020). Development, implementation, and evaluation of a competency-based didactic and simulation-focused boot camp for incoming urology residents: Report of the first three years. *Canadian Urological Association Journal*, 15 (4). <https://doi.org/10.5489/cuaj.6679>
- Wenk, M., Waurick, R., Schotes, D., Wenk, M., Gerdes, C., Van Aken, H., & Pöpping, D. (2008). Simulation-based medical education is no better than problem-based discussions and induces misjudgment in self-assessment. *Advances in Health Sciences Education : Theory and Practice*, 14(2), 159–171. <http://dx.doi.org/10.1007/s10459-008-9098-2>
- Wenzel, A., Matzen, L. H., Spin-Neto, R., & Schropp, L. (2020). Effect of computer-assisted-learning and simulation clinics on dental students' cognitive and performance skills: Panoramic image errors related to patient's head position. *Dentomaxillofacial Radiology*, 49 (7), 20200154. <https://doi.org/10.1259/dmfr.20200154>
- Wheatley, W. J., Hornaday, R. W., & Hunt, T. G. (1988). Developing strategic management goal-setting skills. *Simulation & Games*, 19(2), 173–185.  
<https://doi.org/10.1177%2F104687818801900205>
- Wong, D. T., Mehta, A., Singh, K. P., Leong, S. M., Ooi, A., Niazi, A., You-Ten, E., Okrainec, A., Patel, R., Singh, M., & Wong, J. (2019). The effect of virtual reality bronchoscopy simulator training on performance of bronchoscopic-guided intubation in patients: A randomised controlled trial. *European Journal of Anaesthesiology*, 36 (3), 227–233. <https://doi.org/10.1097/EJA.0000000000000890>
- Xiangdong & Li, X. (2019). Simulation Dominated Approach versus Video Dominated Approach in Teaching Consecutive Interpreting to Undergraduates: An Exploratory Comparison Study. *Onomázein Revista de lingüística filología y traducción*, 44, 106–131. <https://doi.org/10.7764/onomazein.44.06>
- Yang, C.-W., Ku, S.-C., Ma, M. H.-M., Chu, T.-S., & Chang, S.-C. (2019). Application of high-fidelity simulation in critical care residency training as an effective learning, assessment, and prediction tool for clinical performance. *Journal of the Formosan Medical Association*, 118 (9), 1347–1355. <https://doi.org/10.1016/j.jfma.2018.12.003>
- Yeh, M.-L., & Chen, H.-H. (2005). Effects of an educational program with interactive videodisc systems in improving critical thinking dispositions for RN-BSN students in

Taiwan. *International Journal of Nursing Studies*, 42(3), 333–340.

<http://dx.doi.org/10.1016/j.ijnurstu.2004.06.008>

Yeo, C. L., Ho, S. K. Y., Tagamolila, V. C., Arunachalam, S., Bharadwaj, S. S., Poon, W. B., Tan, M. G., Edison, P. E., Yip, W. Y., Haium, A. A. A., Jayagobi, P. A., Vora, S. J., Khurana, S. K., Allen, J. C., & Lustestica, E. I. (2020). Use of web-based game in neonatal resuscitation - is it effective? *BMC Medical Education*, 20 (1), 170.

<https://doi.org/10.1186/s12909-020-02078-5>

Yilmazer, T., Tuzer, H., Inkaya, B., & Elcin, M. (2020). The impact of standardized patient interactions on nursing students' preventive interventions for pressure ulcers. *Journal of Tissue Viability*, 29 (1), 19–23. <https://doi.org/10.1016/j.jtv.2019.11.004>
